# Supplementary material
Source: PubMed Central journal article supplement (PMC4096357)
Supplement: supp_114.163063_163063SI.pdf [file supp_114.163063_163063SI.pdf]

**Table S1. Number of half-sibs families and individuals used in the three experiments carried out on growth cessation. For each experiment and population the first number refers to the number of families and the second to the total number of individuals.**

| Population name | Abbreviation | Growth Chamber 1 | Growth Chamber 2 | Greenhouse |
|-----------------|--------------|------------------|------------------|------------|
| Koshurnikovo    | KOS-54       | 11/31            | 5/40             | 0/0        |
| Sheberta        | SHE-54       | 0/0              | 6/45             | 0/0        |
| Baironovka      | BAI-56       | 0/0              | 0/0              | 0/0        |
| Krasnoyarsk     | KRQ-56       | 8/17             | 0/0              | 11/167     |
| Enyseysk        | ENI-58       | 2/7              | 0/0              | 19/416     |
| Yartsevo        | YAR-60       | 6/17             | 0/0              | 8/153      |
| Bor             | BOR-61       | 17/70            | 0/0              | 20/422     |
| Turukhansk      | TYR-66       | 9/21             | 0/0              | 15/133     |
| Igarka          | IGA-67       | 0/0              | 5/36             | 0/0        |

**Table S2. Population genetic summary data for the loci used in this study. The top nine are candidate loci and the rest of the list are control loci named according to [1]**

| Loci         | Length | $n$ | S  | $\theta_\pi$ | $\theta_w$ | Tajima's $D$ |
|--------------|--------|-----|----|--------------|------------|--------------|
| PoGI         | 2668   | 92  | 32 | 0.00216      | 0.00220    | -0.015       |
| PoCCA1       | 3534   | 83  | 81 | 0.00383      | 0.00392    | -0.31        |
| PoPhyN       | 3167   | 72  | 20 | 0.00089      | 0.00102    | -0.11        |
| PoPhyO       | 2187   | 76  | 6  | 0.00026      | 0.00051    | -0.61        |
| PoPhyP       | 1459   | 85  | 9  | 0.00113      | 0.00108    | 0.18         |
| PoPRR3       | 1448   | 93  | 28 | 0.00079      | 0.00272    | -1.79        |
| PoPRR7       | 2634   | 86  | 56 | 0.00146      | 0.00209    | -0.98        |
| PoFTL2       | 1373   | 83  | 35 | 0.00156      | 0.00285    | -0.91        |
| PoMFTL1      | 2081   | 91  | 99 | 0.00736      | 0.0066     | 0.21         |
| Sequence 8   | 652    | 77  | 32 | 0.00984      | 0.00999    | -0.05        |
| Sequence 12  | 539    | 95  | 10 | 0.00132      | 0.00362    | -1.63        |
| Sequence 14  | 429    | 96  | 3  | 0.00073      | 0.00136    | -0.84        |
| Sequence 18  | 821    | 90  | 2  | 0.00026      | 0.00048    | -0.73        |
| Sequence 22  | 683    | 95  | 11 | 0.00157      | 0.00314    | -1.32        |
| Sequence 24  | 723    | 94  | 11 | 0.00245      | 0.00297    | -0.46        |
| Sequence 28  | 1141   | 82  | 19 | 0.00111      | 0.00335    | -1.97        |
| Sequence 31  | 649    | 95  | 10 | 0.00334      | 0.00301    | 0.28         |
| Sequence 32  | 726    | 95  | 9  | 0.00092      | 0.00242    | -1.56        |
| Sequence 33  | 803    | 92  | 20 | 0.00402      | 0.00489    | -0.52        |
| Sequence 37  | 629    | 96  | 16 | 0.00272      | 0.00495    | -1.27        |
| Sequence 49  | 535    | 93  | 9  | 0.00193      | 0.00330    | -1.05        |
| Sequence 56  | 572    | 93  | 21 | 0.00832      | 0.00719    | 0.46         |
| Sequence 58  | 600    | 95  | 23 | 0.00964      | 0.00748    | 0.86         |
| Sequence 59  | 740    | 95  | 9  | 0.00316      | 0.00237    | 0.84         |
| Sequence 60  | 434    | 96  | 2  | 0.00032      | 0.00090    | -1.00        |
| Sequence 62  | 744    | 96  | 23 | 0.00689      | 0.00602    | 0.43         |
| Sequence 68  | 601    | 92  | 16 | 0.00574      | 0.00523    | 0.28         |
| Sequence 69  | 708    | 95  | 6  | 0.00098      | 0.00165    | -0.92        |
| Sequence 70  | 929    | 95  | 28 | 0.00446      | 0.00588    | -0.73        |
| Sequence 77  | 507    | 95  | 17 | 0.00478      | 0.00654    | -0.77        |
| Sequence 87  | 633    | 90  | 6  | 0.00127      | 0.00187    | -0.73        |
| Sequence 88  | 599    | 95  | 26 | 0.00743      | 0.00847    | -0.37        |
| Sequence 89  | 642    | 95  | 8  | 0.00225      | 0.00243    | -0.18        |
| Sequence 92  | 740    | 91  | 16 | 0.00317      | 0.00425    | -0.72        |
| Sequence 99  | 557    | 82  | 5  | 0.00179      | 0.00180    | -0.02        |
| Sequence 100 | 459    | 90  | 0  | 0            | 0          | <i>n.a.</i>  |

**Table S3. Summary statistics for the seven populations analyzed with 14 SSRs**

| Population   | $n$ | Allelic richness | $H_e$ | $F_{IS}$ | $F_{IS}$ corrected <sup>1</sup> |
|--------------|-----|------------------|-------|----------|---------------------------------|
| Koshurnikovo | 10  | 2.52             | 0.65  | 0.20     | 0                               |
| Krasnoyarsk  | 21  | 2.56             | 0.66  | 0.24     | 0                               |
| Yeniseysk    | 26  | 2.61             | 0.66  | 0.15     | 0                               |
| Yartsevo     | 17  | 2.53             | 0.65  | 0.16     | 0                               |
| Bor          | 19  | 2.43             | 0.61  | 0.14     | 0                               |
| Turukhansk   | 16  | 2.65             | 0.69  | 0.18     | 0                               |
| Igarka       | 4   | 2.62             | 0.73  | 0.27     | 0                               |

1:  $F_{IS}$  corrected by INEST [2]

**Table S4. Model probabilities (bold) and Bayes factors between the three models where Bayes factors are calculated as the ratio of the marginal likelihood of the two models under comparison:  $p(y|M_1)/p(y|M_0)$**

|     | SNM          | BOT          | EXP          |
|-----|--------------|--------------|--------------|
| SNM | <b>0.365</b> | 0.878        | 1.650        |
| BOT | 1.139        | <b>0.414</b> | 1.857        |
| EXP | 0.606        | 0.539        | <b>0.222</b> |

**Table S5. Enrichment ratios of candidate to control SNPs (LD groups)**

|                            | 90%                   | 95%       | 97.5%    | 99%         |
|----------------------------|-----------------------|-----------|----------|-------------|
| LinReg                     | 1.1(0.7) <sup>1</sup> | 1.1(0.7)  | 1.7(0.9) | 0.8(0.8)    |
| BAYENV                     | 1.2(0.9)              | 1.7*(1.3) | 0.8(0.9) | 1.5(1.7)    |
| $F_{ST}$                   | 0.9(0.7)              | 0.9(0.8)  | 1.1(0.8) | 1(1)        |
| LinReg & BAYENV            | 1.3(0.9)              | 1.1(1)    | 1(0.8)   | 1(1)        |
| BAYENV & $F_{ST}$          | 1.8(1.4)              | 2.8(2.3)  | 1.3(1.5) | 3/0(3/0)    |
| LinReg & BAYENV & $F_{ST}$ | 1.2(1.3)              | 2/0(1/0)  | 2/0(1/0) | <i>n.a.</i> |

<sup>1</sup> Numbers in parentheses indicate the ratios calculated using LD groups.

\*: Fisher's exact test  $p$ -value < 0.05.

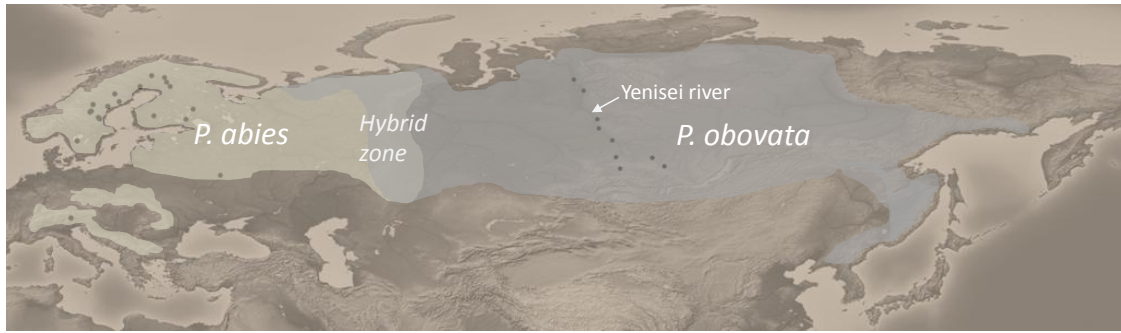

**Figure S1. Location of the populations used in this study. The distributions of *P. abies* and *P. obovata* and their hybrid zone are also shown.** The distribution of *P. abies* is based on the Euforgen map (EUFORGEN 2009, [www.euforgen.org](http://www.euforgen.org)) and that of *P. obovata* is taken from [3]. The approximate location of the hybrid zone was inferred by genotyping 99 populations at 13 nuclear SSR loci and three cpSSR loci (Y. Tsuda, T. Källman, M. Lascoux, L. Parducci, D. Politov, V. Semerikov, J.H. Sønstebo, C. Sperisen, M.M. Tollefsrud, M. Väliiranta, G.G. Vendramin, in preparation) and from [4] and [5]. The dots within the *P. abies* range indicates the populations used in [6].

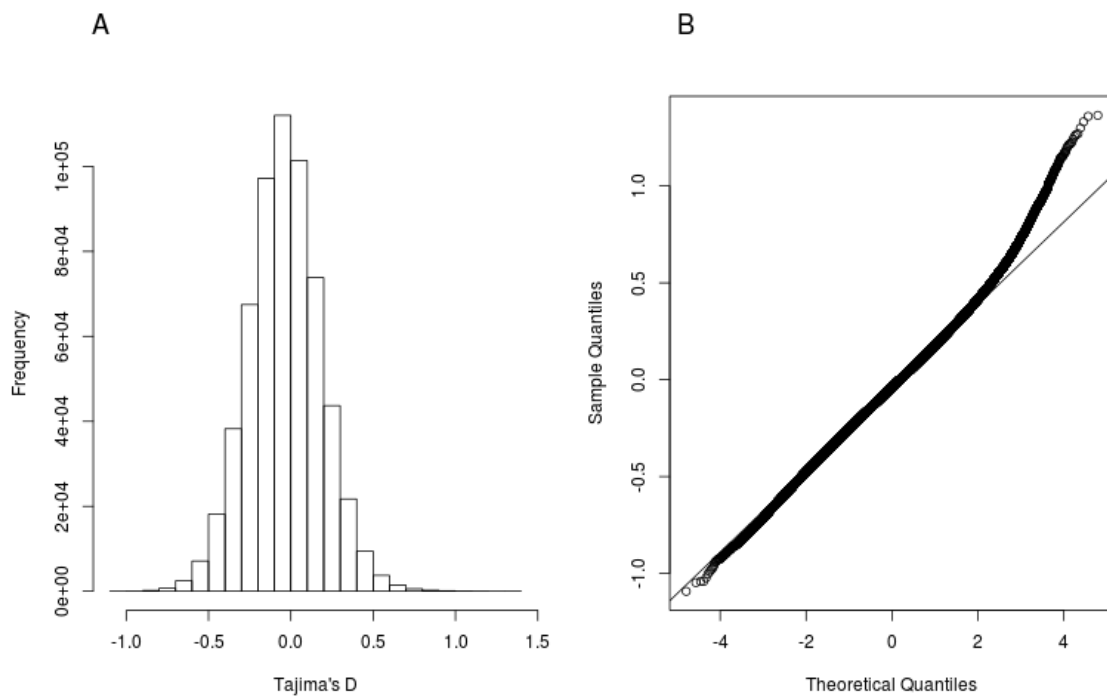

Figure S2. A histogram of Tajima's D values under a standard neutral model (A) and a Q-Q plot of Tajima's D plotted against a standard normal distribution (B).

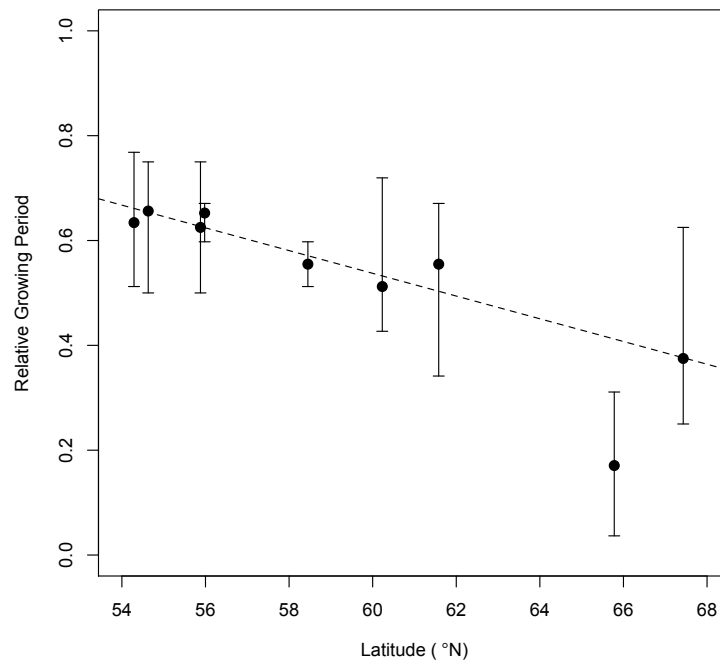

**Figure S3. Average number of growing days for populations along the Yenisei river from south to north.** Vertical bars represent the standard deviation for each measurement. Data from all nine populations were used here. Photoperiodic treatments started with one week of constant light, followed by one week at 22-h light / 2-h dark, and so on. The dark period was extended by 1.5 hours each week until a photoperiod of 14.5 light / 9.5-h dark was reached. To aid visualization and present the results on the same scale across the two experiments the observed number of growing days was transformed into relative growing period, which is the observed growth relative to the maximum growth period of each experiment ( $df = 83$ ,  $r^2 = 0.5904$ ,  $p\text{-value} = 3.45E - 07$ ).



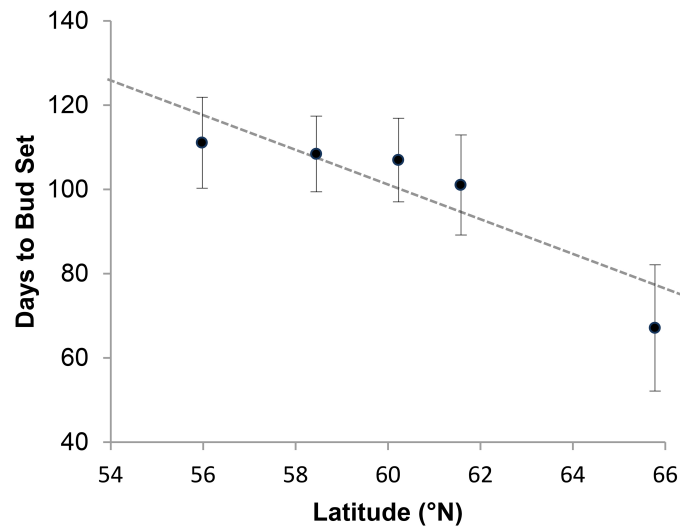

**Figure S4. Average days to bud set for five populations along the Yenisei River, included in the greenhouse experiment at Haapastensyrjä in Southern Finland (60.62°N, 24.43°E).** Vertical bars represent the standard deviation for each measurement. Time to bud set was observed weekly. The dotted line is a regression line ( $p$ -value < 0.001,  $r^2 = 0.432$ ,  $df = 1288$ )

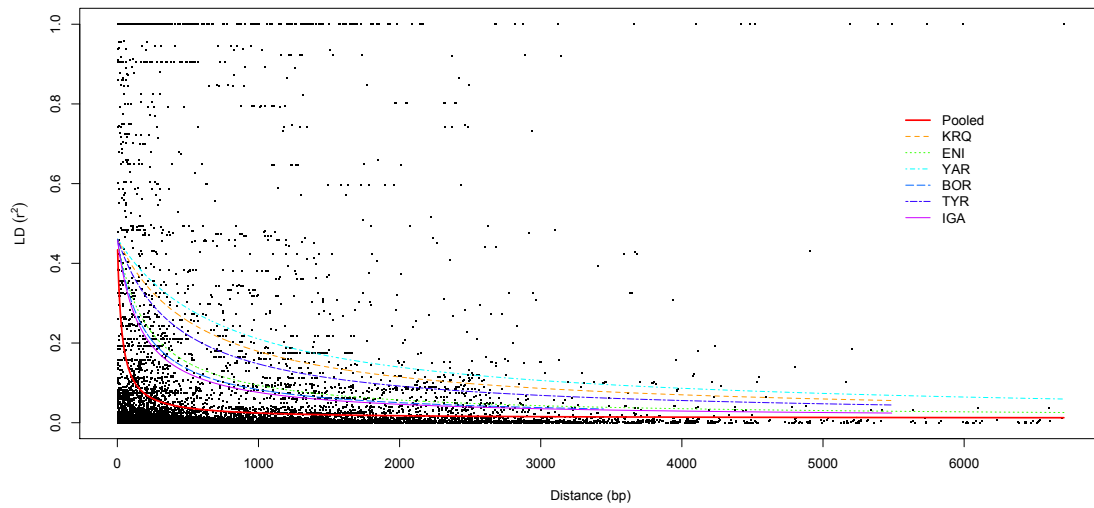

**Figure S5.** LD decay within each locus in *P. obovata*. Data from all populations were pooled and the curve represents the correlation of  $r^2$  with distance.

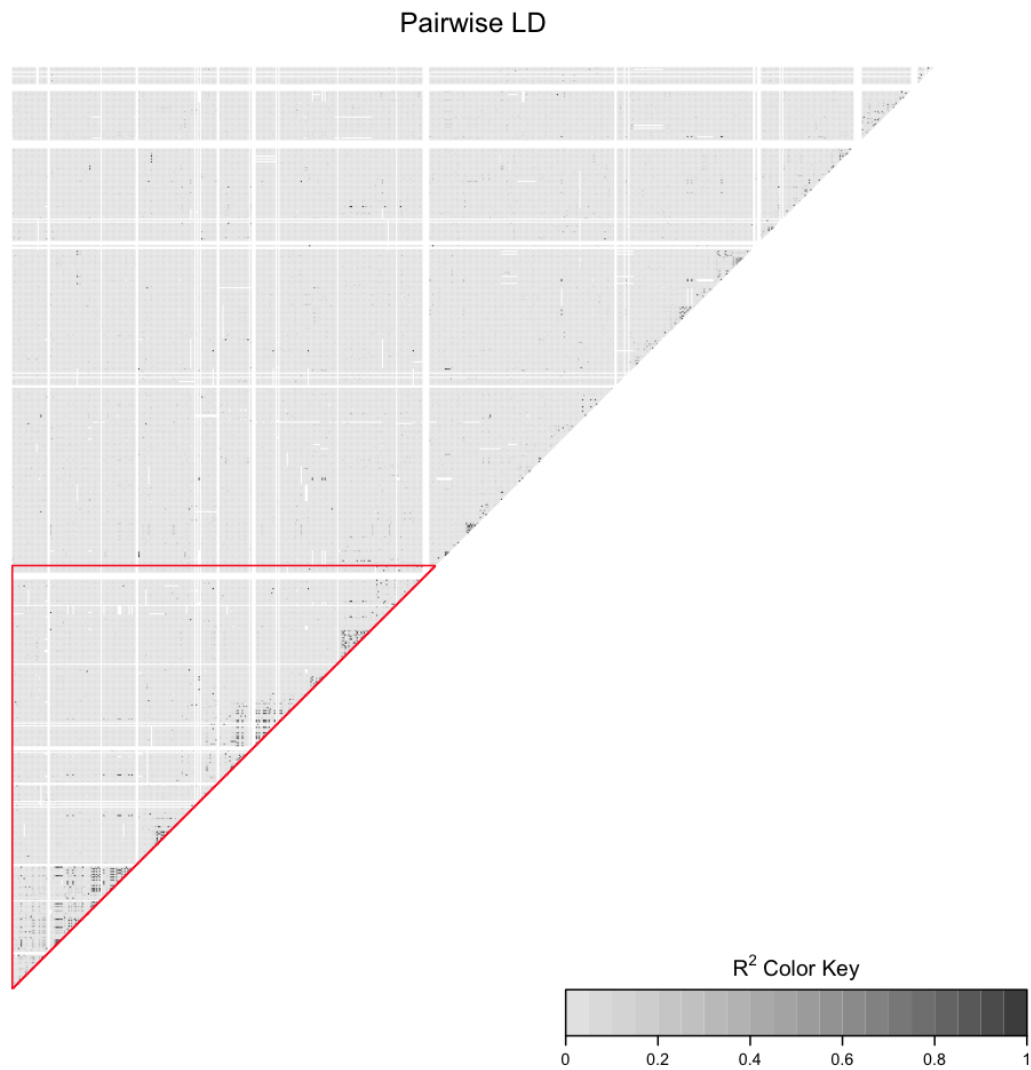

**Figure S6. Pairwise LD blocks in *P. obovata*.** Data from all populations were pooled and the red triangle shows the LD blocks of candidate genes.

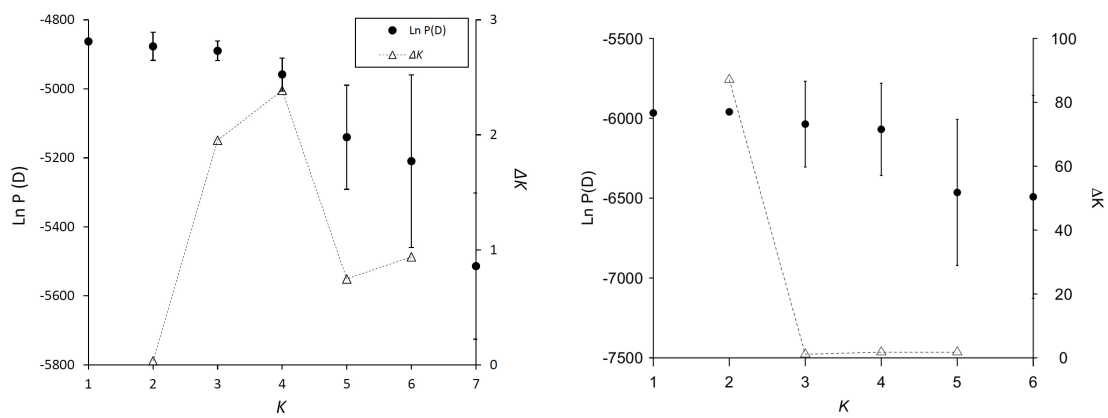

Figure S7.  $\text{Ln}P(D)$  and  $\Delta K$  for SSRs (left) and SNPs (right)

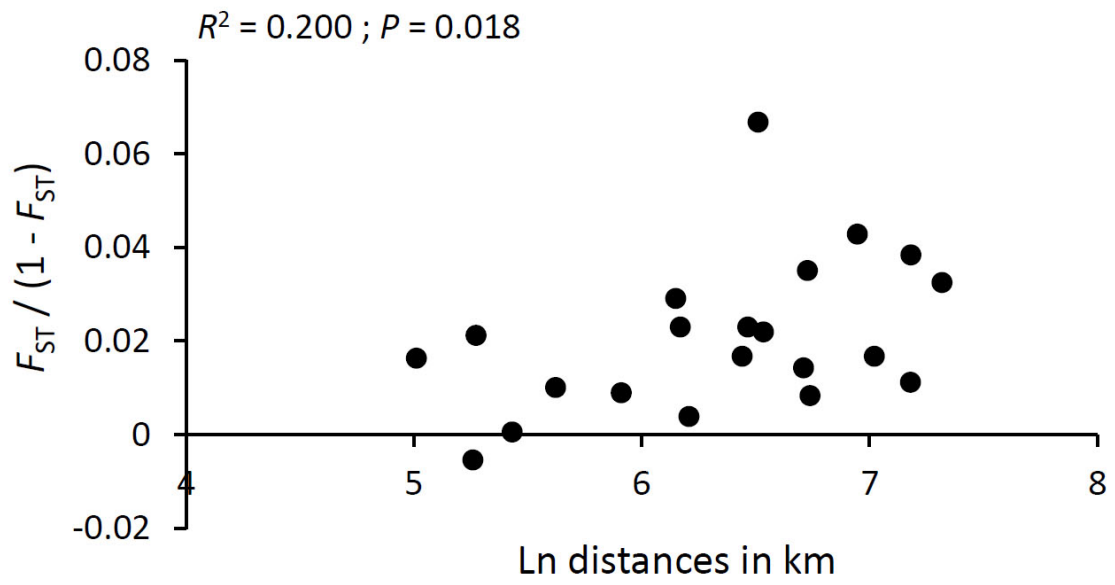

Figure S8. Isolation-by-distance estimated from the 14 SSRs loci

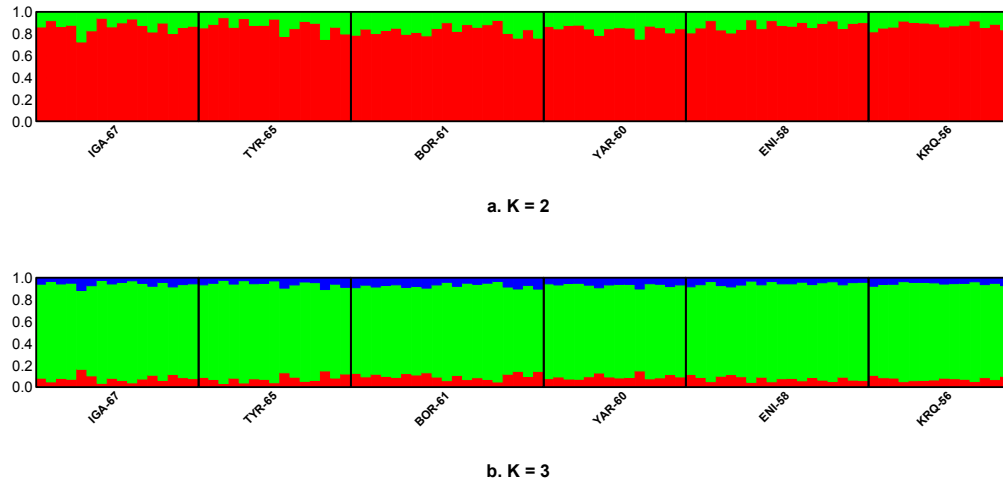

**Figure S9. Clustering analysis conducted in STRUCTURE using 240 independent SNPs.** For each dataset,  $K = 1$  to  $K = 6$  were tested.  $K=2$  and  $K=3$  are presented to illustrate the lack of population genetic structure.

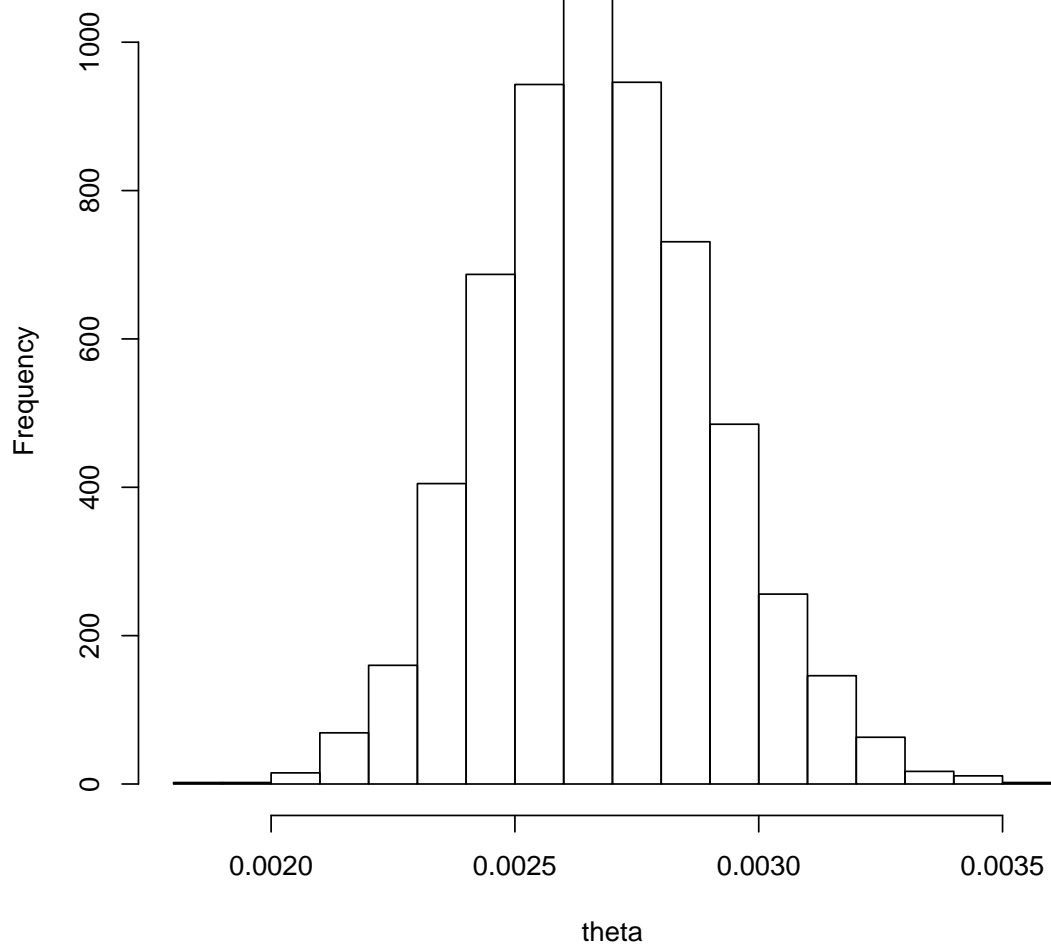

Figure S10. Posterior distribution for SNM model of  $\theta$  inferred from silent sites.

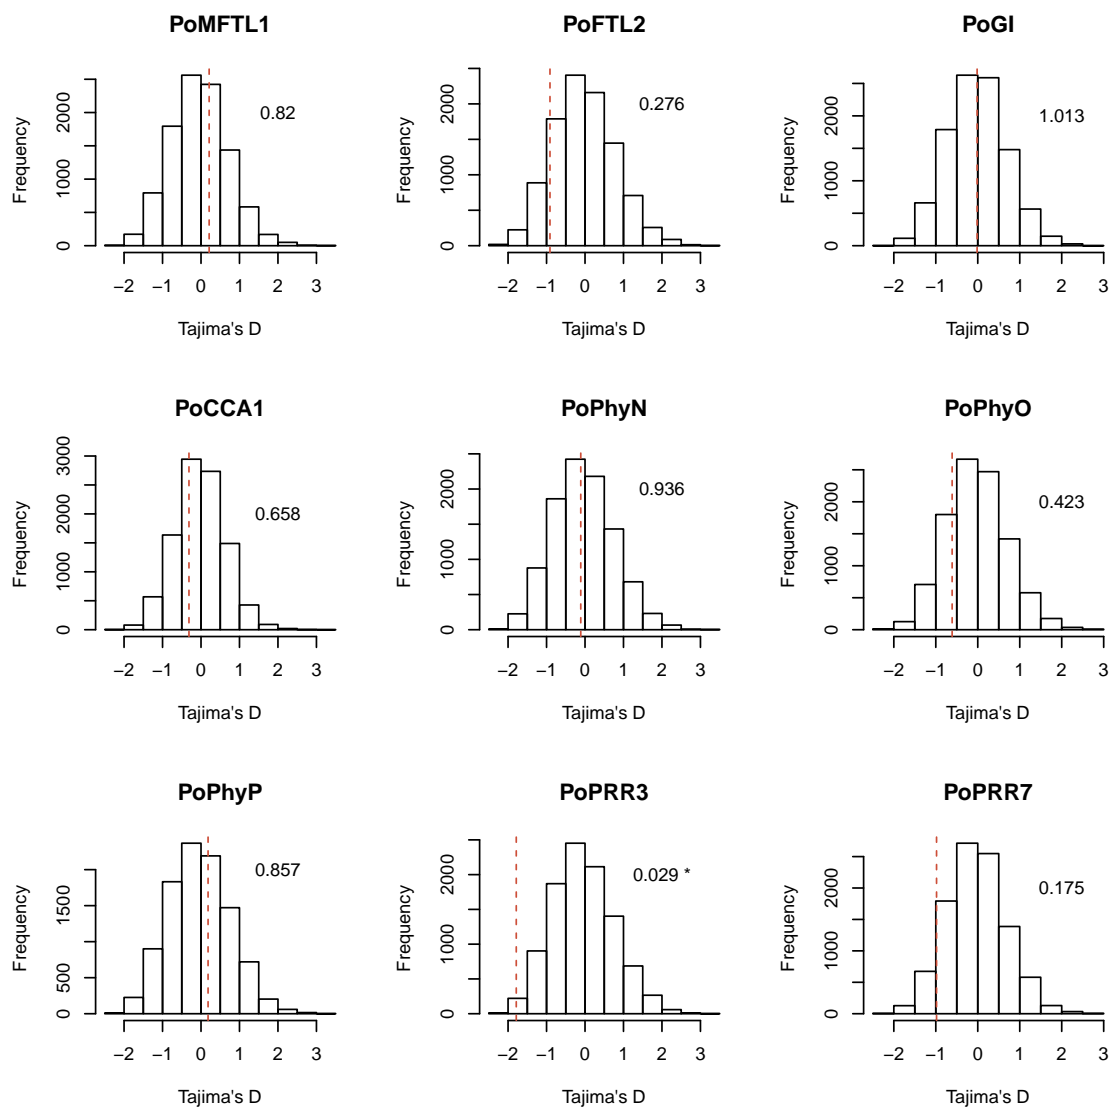

**Figure S11.** Posterior predictive distributions of Tajima's  $D$  for the SNM model inferred from silent sites with the red lines indicating the observed statistics calculated for all sites.  $p$ -values indicate whether the loci deviate significantly (\*) from the posterior predictive simulations.



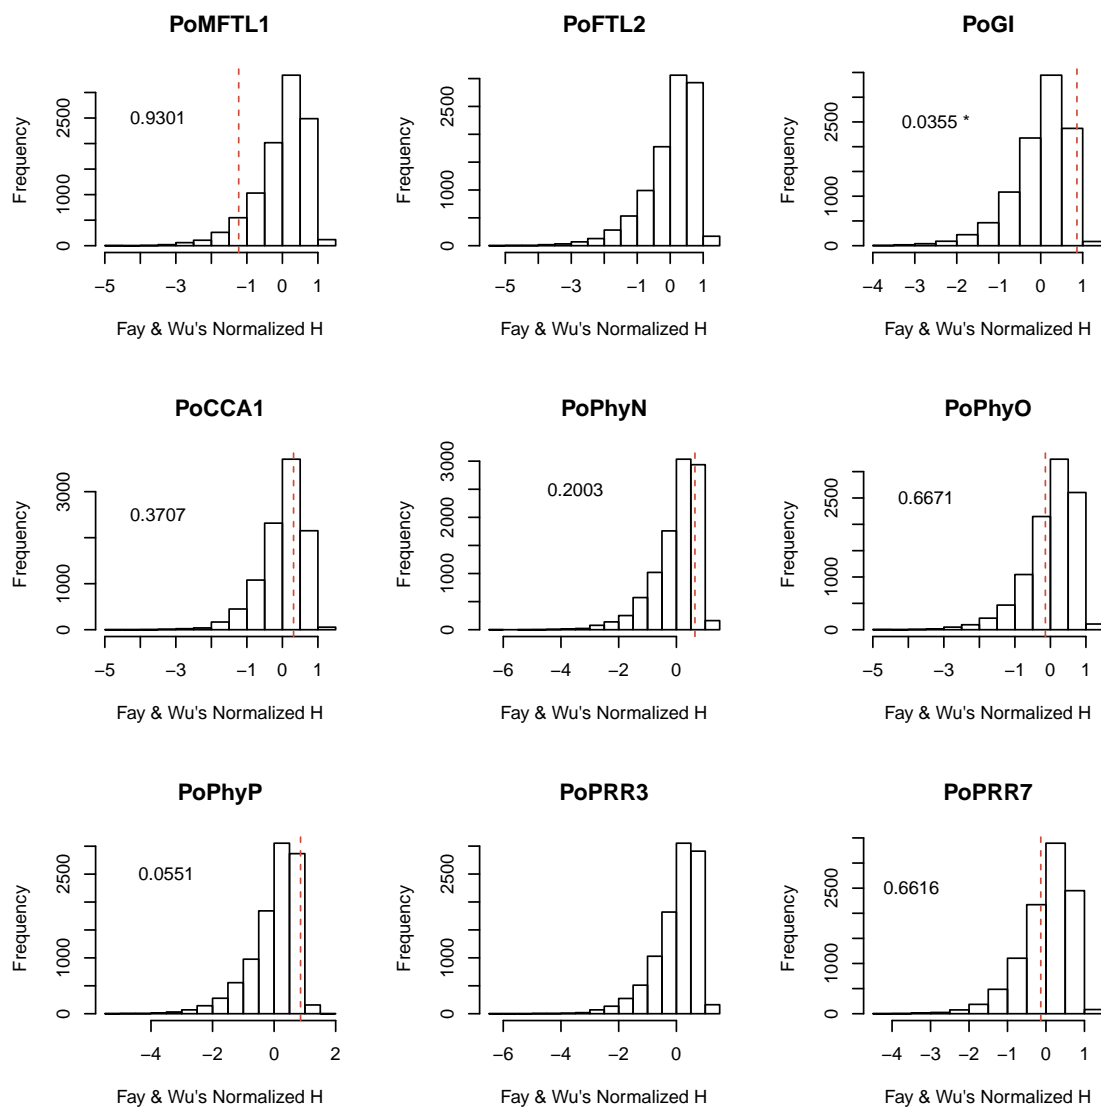

**Figure S12. Posterior predictive distributions of Fay and Wu's  $H$  for SNM model inferred from silent sites.** Red lines are observed statistics calculated for all sites. There are no observed values for *PoFTL2* and *PoPRR3* due to the lack of outgroup.

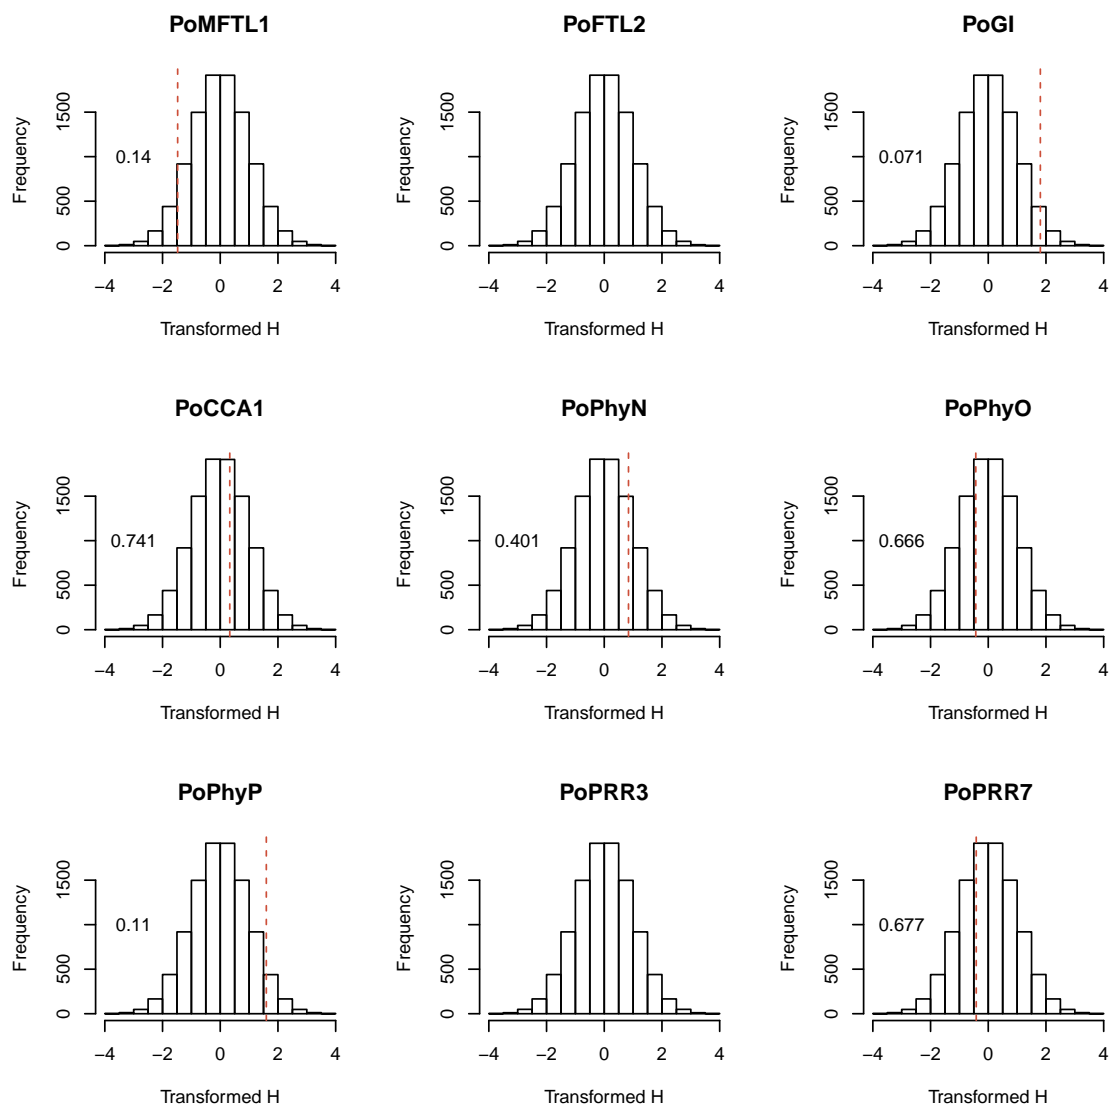

**Figure S13. Rank transformed posterior predictive distributions of Fay and Wu's  $H$  for SNM model inferred from silent sites.** Red lines are observed statistics calculated for all sites. There are no observed values for *PoFTL2* and *PoPRR3* due to the lack of outgroup.  $p$ -values indicate whether the loci deviate significantly (\*) from the posterior predictive simulations.

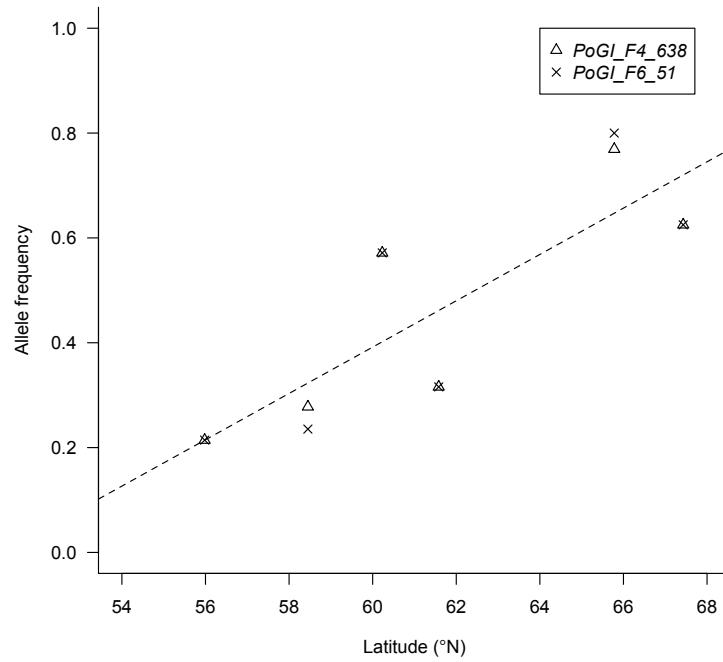

**Figure S14. An example of clinal variation in the circadian clock gene *PoGI*.** Linear regression of transformed minor allele frequency on latitude at the non-synonymous LD group of *PoGI<sub>F4.638</sub>* (linear regression  $p$ -value = 0.038, adjusted  $R^2$  = 0.62)

## References

1. Pavy N, Namroud MC, Gagnon F, Isabel N, Bousquet J (2012) The heterogeneous levels of linkage disequilibrium in white spruce genes and comparative analysis with other conifers. *Heredity* 108: 273–84.
2. Chybicki IJ, Burczyk J (2009) Simultaneous Estimation of Null Alleles and Inbreeding Coefficients. *Journal of Heredity* 100: 106–113.
3. Lockwood JD JM Aleksic, Zou J, Wang J, Liu J, Renner SS (2013) A new phylogeny for the genus *Picea* from plastid, mitochondrial, and nuclear sequences. *Molecular Phylogenetics and Evolution* in press.
4. Krutovskii KV, Bergmann F (1995) Introgressive hybridization and phylogenetic relationships between Norway, *Picea abies* (L.) Karst., and Siberian, *P. obovata* Ledeb., spruce species studied by isozyme loci. *Heredity* 74: 464–480.
5. Popov PP (2003) Structure and differentiation of spruce populations in Eastern Europe and Western Siberia. *Russian Journal of Ecology* 34: 30–36.
6. Chen J, Källman T, Ma X, Gyllenstrand N, Zaina G, et al. (2012) Disentangling the roles of history and local selection in shaping clinal variation of allele frequencies and gene expression in Norway spruce (*Picea abies*). *Genetics* 191: 865–881.

**File S1**

**Outliers detected with different approaches**

Available for download as an Excel file at <http://www.genetics.org/lookup/suppl/doi:10.1534/genetics.114.163063/-/DC1>
