# Supplementary material
Source: PubMed Central journal article supplement (PMC4096357)
Supplement: supp_114.163063_FigureS1.pdf [file supp_114.163063_FigureS1.pdf]

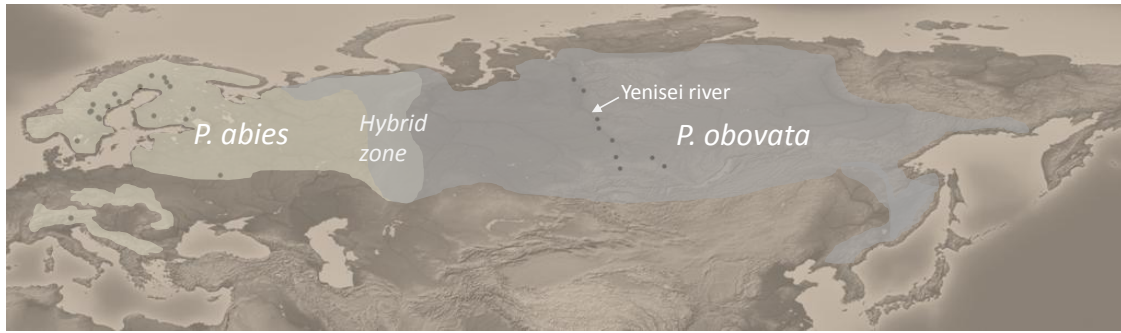

**Figure S1. Location of the populations used in this study. The distributions of *P. abies* and *P. obovata* and their hybrid zone are also shown.** The distribution of *P. abies* is based on the Euforgen map (EUFORGEN 2009, [www.euforgen.org](http://www.euforgen.org)) and that of *P. obovata* is taken from [3]. The approximate location of the hybrid zone was inferred by genotyping 99 populations at 13 nuclear SSR loci and three cpSSR loci (Y. Tsuda, T. Källman, M. Lascoux, L. Parducci, D. Politov, V. Semerikov, J.H. Sønstebo, C. Sperisen, M.M. Tollefsrud, M. Väliiranta, G.G. Vendramin, in preparation) and from [4] and [5]. The dots within the *P. abies* range indicates the populations used in [6].
