# Supplementary material
Source: PubMed Central journal article supplement (PMC4096357)
Supplement: supp_114.163063_FigureS2.pdf [file supp_114.163063_FigureS2.pdf]

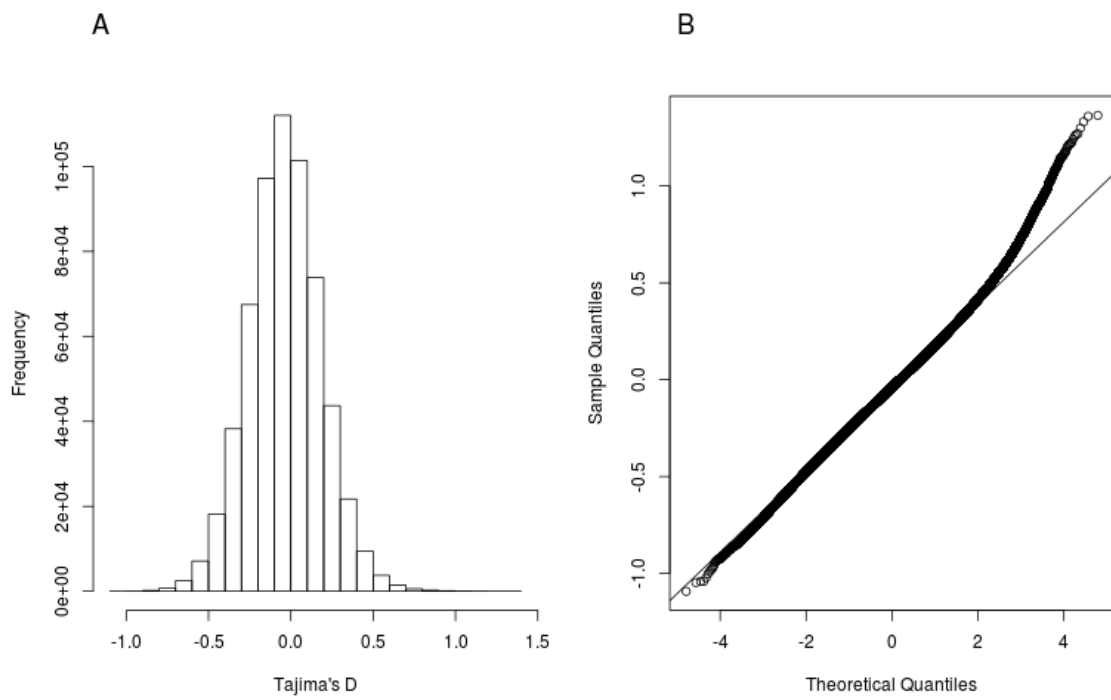

Figure S2. A histogram of Tajima's D values under a standard neutral model (A) and a Q-Q plot of Tajima's D plotted against a standard normal distribution (B).
