# Supplementary material
Source: PubMed Central journal article supplement (PMC4096357)
Supplement: supp_114.163063_FigureS3.pdf [file supp_114.163063_FigureS3.pdf]

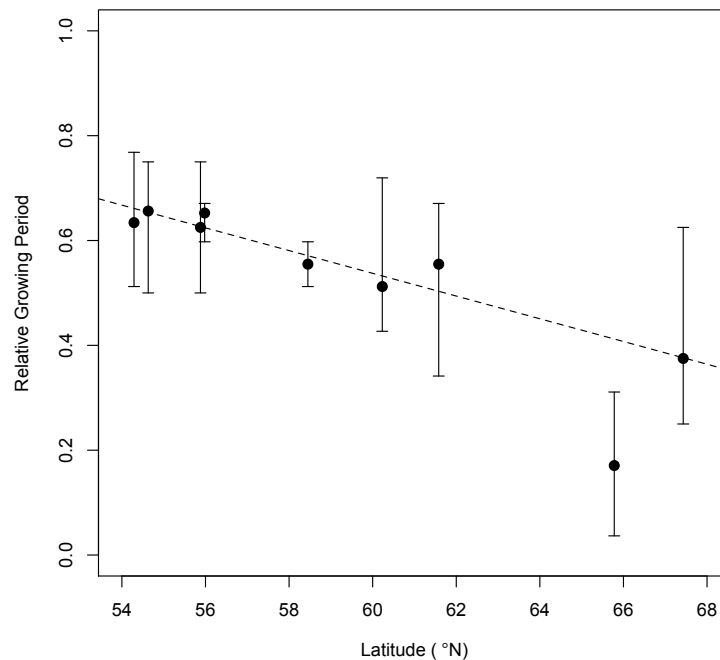

**Figure S3. Average number of growing days for populations along the Yenisei river from south to north.** Vertical bars represent the standard deviation for each measurement. Data from all nine populations were used here. Photoperiodic treatments started with one week of constant light, followed by one week at 22-h light / 2-h dark, and so on. The dark period was extended by 1.5 hours each week until a photoperiod of 14.5 light / 9.5-h dark was reached. To aid visualization and present the results on the same scale across the two experiments the observed number of growing days was transformed into relative growing period, which is the observed growth relative to the maximum growth period of each experiment ( $df = 83$ ,  $r^2 = 0.5904$ ,  $p\text{-value} = 3.45E - 07$ ).
