# Supplementary material
Source: PubMed Central journal article supplement (PMC4096357)
Supplement: supp_114.163063_FigureS4.pdf [file supp_114.163063_FigureS4.pdf]

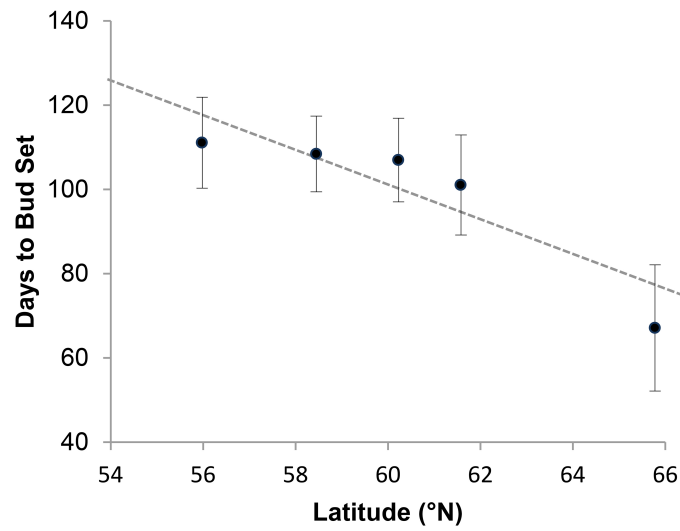

**Figure S4. Average days to bud set for five populations along the Yenisei River, included in the greenhouse experiment at Haapastensyrjä in Southern Finland (60.62°N, 24.43°E).** Vertical bars represent the standard deviation for each measurement. Time to bud set was observed weekly. The dotted line is a regression line ( $p$ -value < 0.001,  $r^2 = 0.432$ ,  $df = 1288$ )
