# Supplementary material
Source: PubMed Central journal article supplement (PMC4096357)
Supplement: supp_114.163063_FigureS5.pdf [file supp_114.163063_FigureS5.pdf]

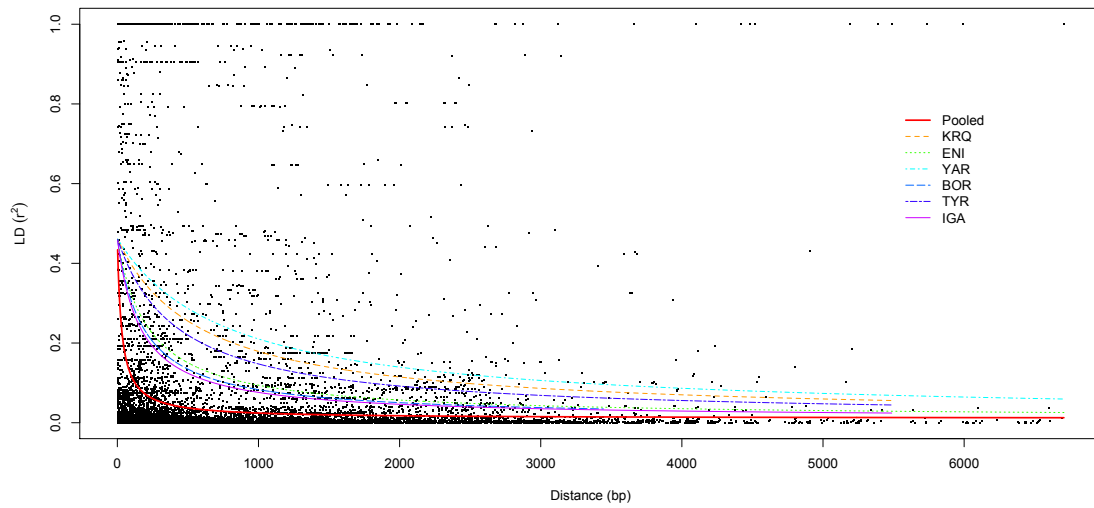

**Figure S5.** LD decay within each locus in *P. obovata*. Data from all populations were pooled and the curve represents the correlation of  $r^2$  with distance.
