# Supplementary material
Source: PubMed Central journal article supplement (PMC4096357)
Supplement: supp_114.163063_FigureS6.pdf [file supp_114.163063_FigureS6.pdf]

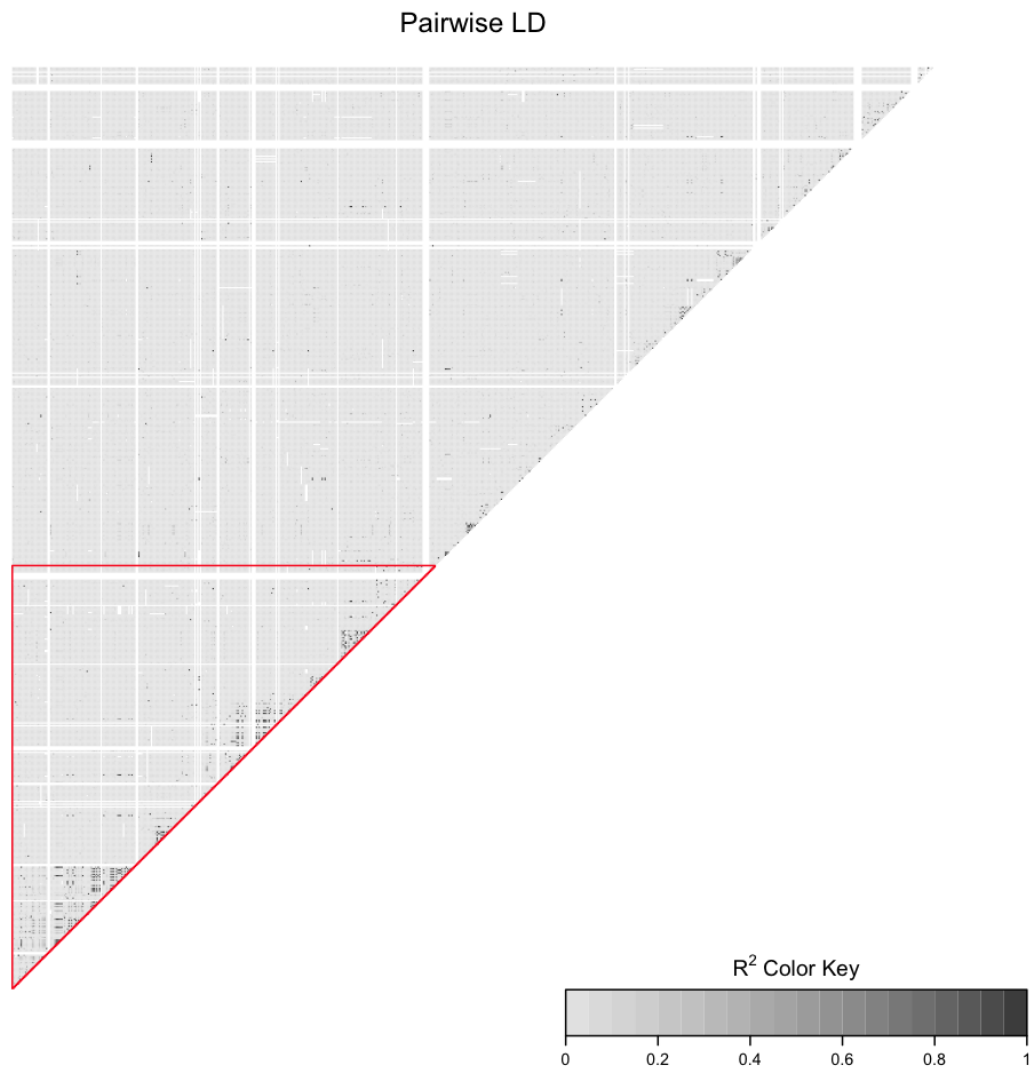

**Figure S6. Pairwise LD blocks in *P. obovata*.** Data from all populations were pooled and the red triangle shows the LD blocks of candidate genes.
