# Supplementary material
Source: PubMed Central journal article supplement (PMC4096357)
Supplement: supp_114.163063_FigureS9.pdf [file supp_114.163063_FigureS9.pdf]

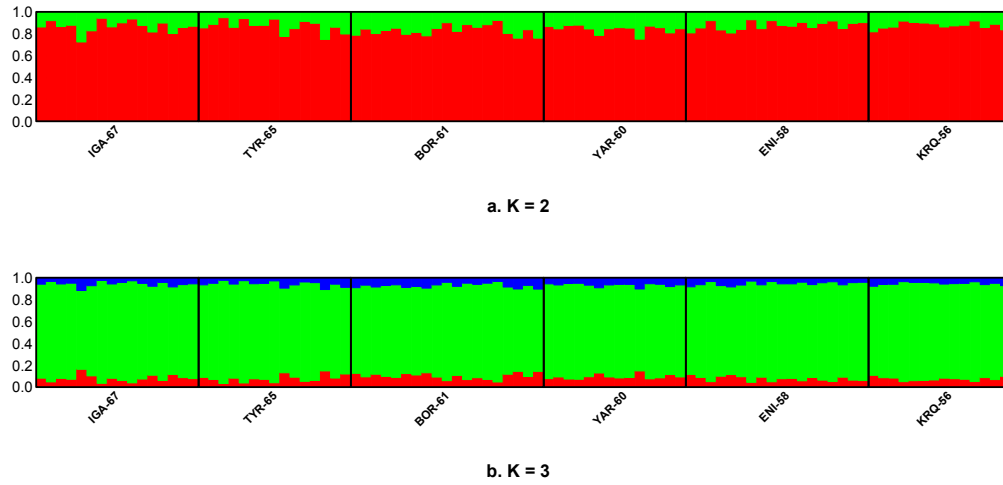

**Figure S9. Clustering analysis conducted in STRUCTURE using 240 independent SNPs.** For each dataset,  $K = 1$  to  $K = 6$  were tested.  $K=2$  and  $K=3$  are presented to illustrate the lack of population genetic structure.
