# Supplementary material
Source: PubMed Central journal article supplement (PMC4096357)
Supplement: supp_114.163063_FigureS11.pdf [file supp_114.163063_FigureS11.pdf]

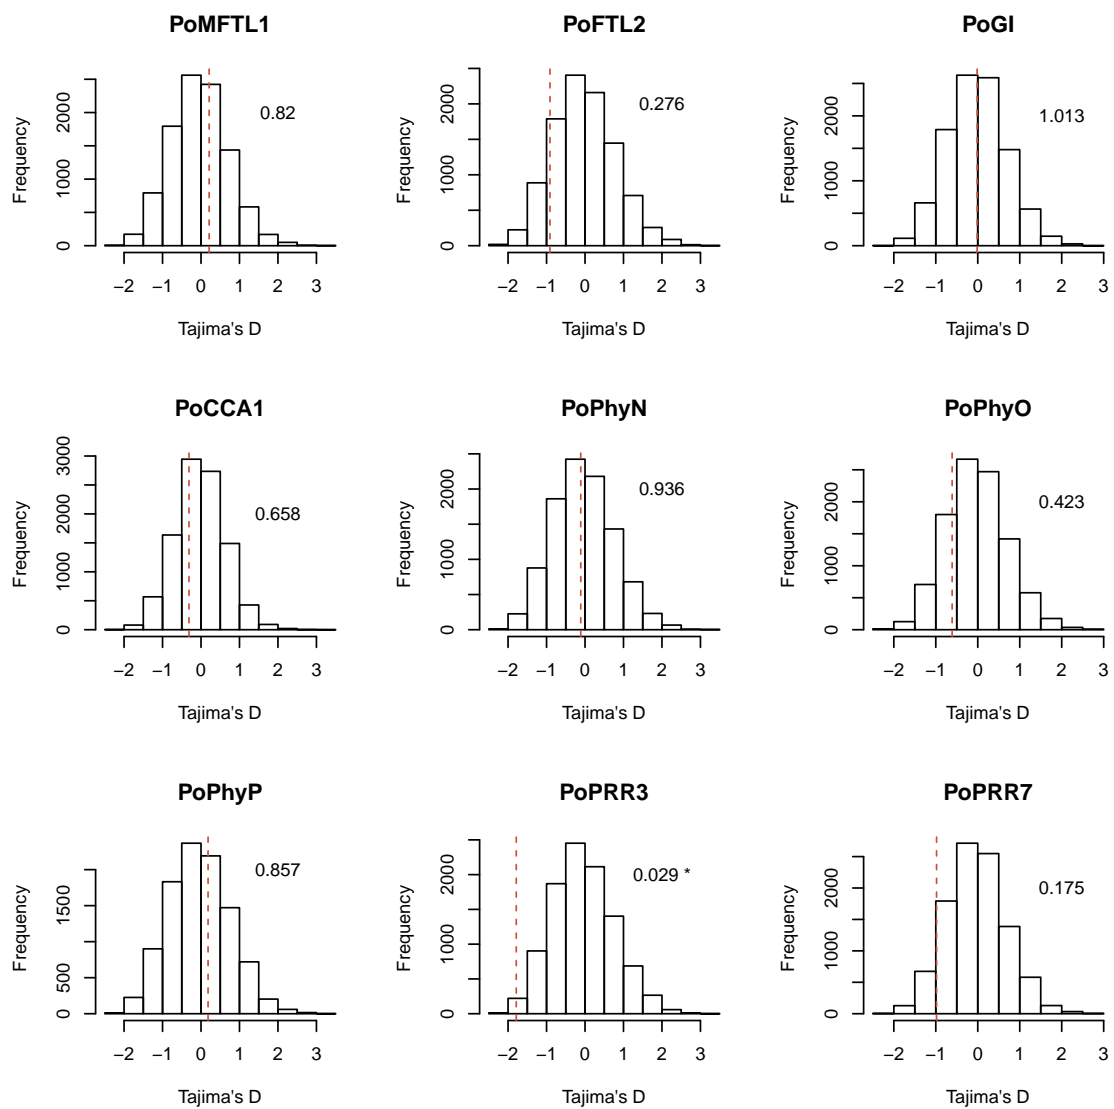

**Figure S11.** Posterior predictive distributions of Tajima's  $D$  for the SNM model inferred from silent sites with the red lines indicating the observed statistics calculated for all sites.  $p$ -values indicate whether the loci deviate significantly (\*) from the posterior predictive simulations.
