# Supplementary material
Source: PubMed Central journal article supplement (PMC4096357)
Supplement: supp_114.163063_FigureS12.pdf [file supp_114.163063_FigureS12.pdf]

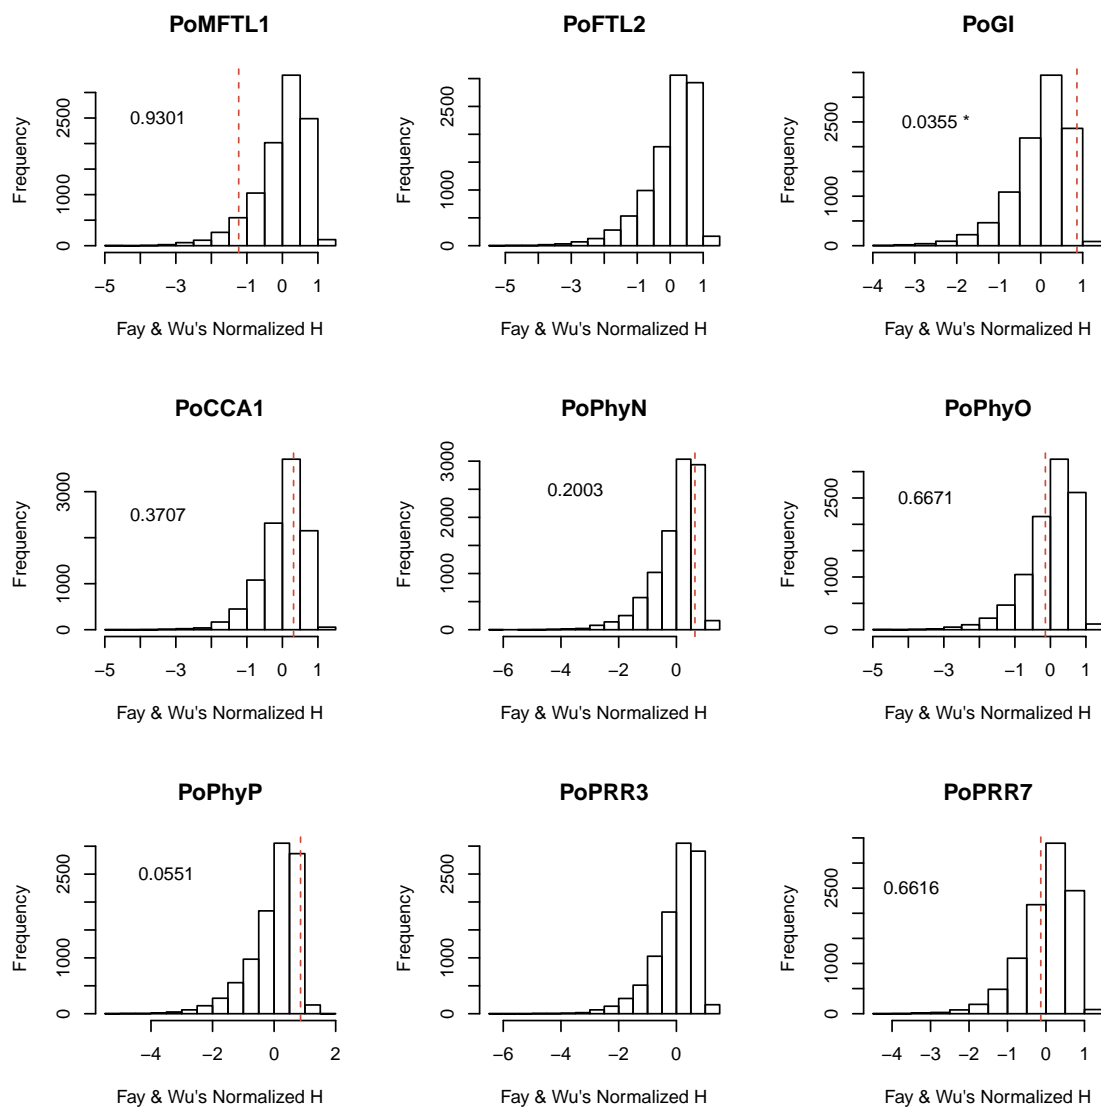

**Figure S12. Posterior predictive distributions of Fay and Wu's  $H$  for SNM model inferred from silent sites.** Red lines are observed statistics calculated for all sites. There are no observed values for *PoFTL2* and *PoPRR3* due to the lack of outgroup.
