# Supplementary material
Source: PubMed Central journal article supplement (PMC4096357)
Supplement: supp_114.163063_FigureS13.pdf [file supp_114.163063_FigureS13.pdf]

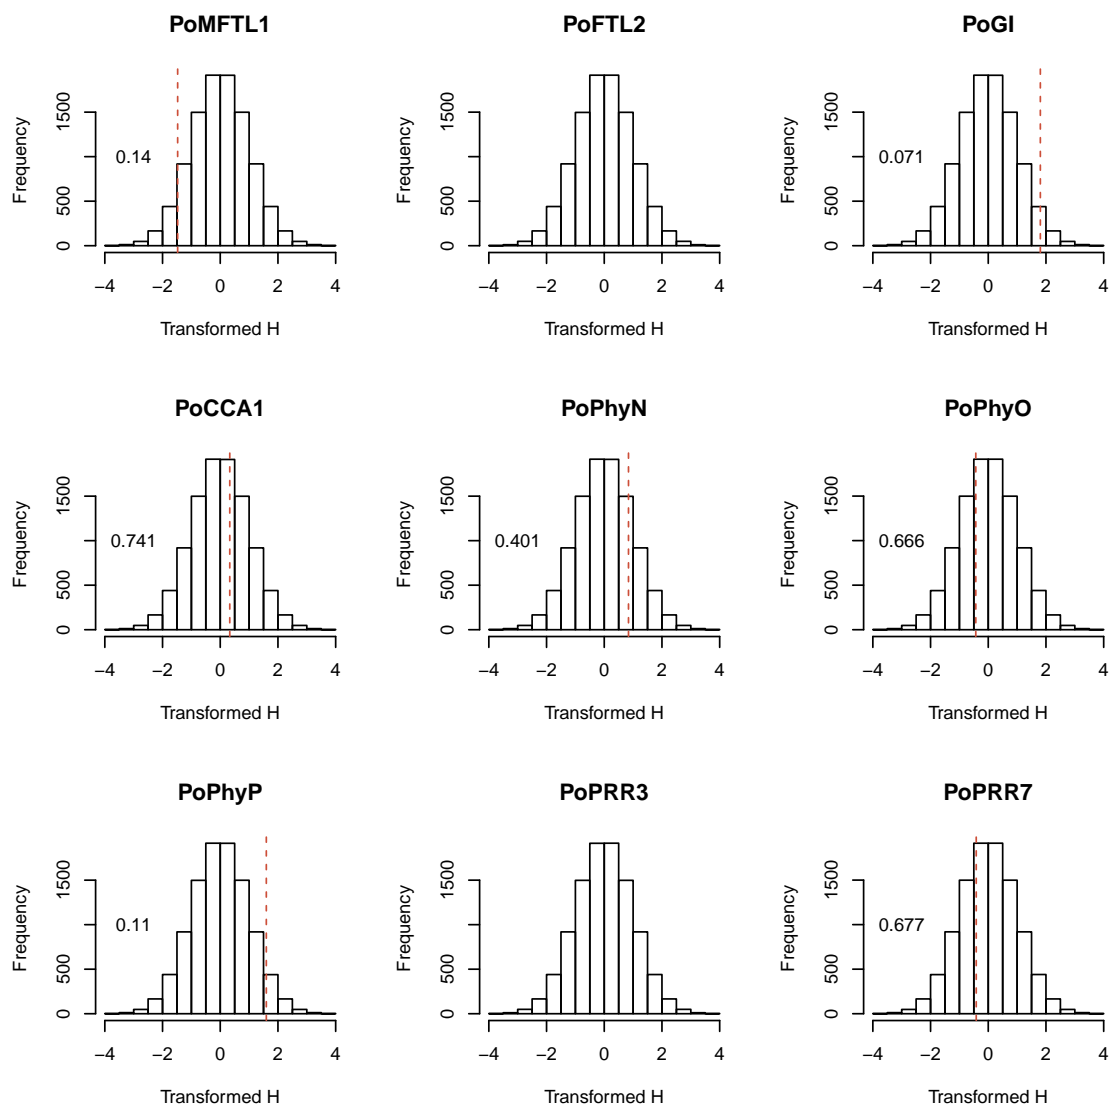

**Figure S13. Rank transformed posterior predictive distributions of Fay and Wu's  $H$  for SNM model inferred from silent sites.** Red lines are observed statistics calculated for all sites. There are no observed values for *PoFTL2* and *PoPRR3* due to the lack of outgroup.  $p$ -values indicate whether the loci deviate significantly (\*) from the posterior predictive simulations.
