# Supplementary material
Source: PubMed Central journal article supplement (PMC4096357)
Supplement: supp_114.163063_FigureS14.pdf [file supp_114.163063_FigureS14.pdf]

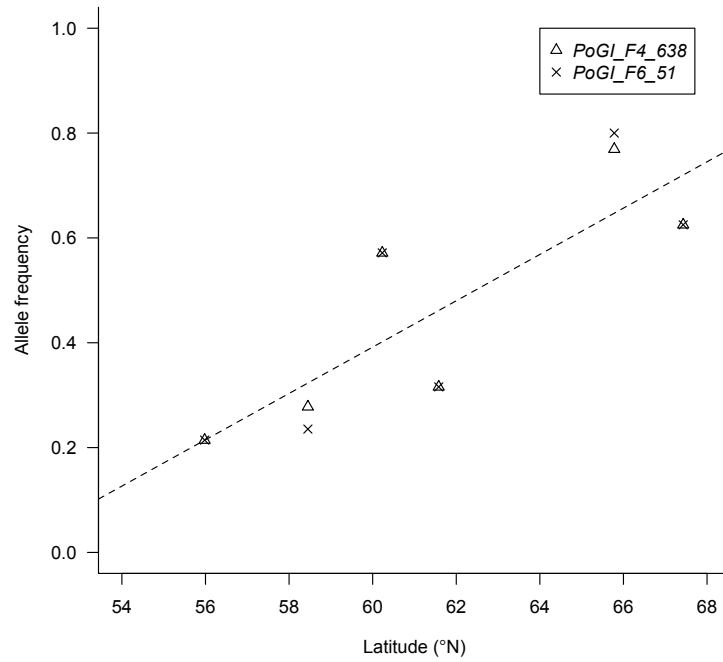

**Figure S14. An example of clinal variation in the circadian clock gene *PoGI*.** Linear regression of transformed minor allele frequency on latitude at the non-synonymous LD group of *PoGI*<sub>F4.638</sub> (linear regression  $p$ -value = 0.038, adjusted  $R^2$  = 0.62)
