# Supplementary material
Source: PubMed Central journal article supplement (PMC4096357)
Supplement: supp_114.163063_TableS1.pdf [file supp_114.163063_TableS1.pdf]

**Table S1. Number of half-sibs families and individuals used in the three experiments carried out on growth cessation. For each experiment and population the first number refers to the number of families and the second to the total number of individuals.**

| Population name | Abbreviation | Growth Chamber 1 | Growth Chamber 2 | Greenhouse |
|-----------------|--------------|------------------|------------------|------------|
| Koshurnikovo    | KOS-54       | 11/31            | 5/40             | 0/0        |
| Sheberta        | SHE-54       | 0/0              | 6/45             | 0/0        |
| Baironovka      | BAI-56       | 0/0              | 0/0              | 0/0        |
| Krasnoyarsk     | KRQ-56       | 8/17             | 0/0              | 11/167     |
| Enyseysk        | ENI-58       | 2/7              | 0/0              | 19/416     |
| Yartsevo        | YAR-60       | 6/17             | 0/0              | 8/153      |
| Bor             | BOR-61       | 17/70            | 0/0              | 20/422     |
| Turukhansk      | TYR-66       | 9/21             | 0/0              | 15/133     |
| Igarka          | IGA-67       | 0/0              | 5/36             | 0/0        |
