# Supplementary material
Source: PubMed Central journal article supplement (PMC4096357)
Supplement: supp_114.163063_TableS2.pdf [file supp_114.163063_TableS2.pdf]

**Table S2. Population genetic summary data for the loci used in this study. The top nine are candidate loci and the rest of the list are control loci named according to [1]**

| Loci         | Length | $n$ | S  | $\theta_\pi$ | $\theta_w$ | Tajima's $D$ |
|--------------|--------|-----|----|--------------|------------|--------------|
| PoGI         | 2668   | 92  | 32 | 0.00216      | 0.00220    | -0.015       |
| PoCCA1       | 3534   | 83  | 81 | 0.00383      | 0.00392    | -0.31        |
| PoPhyN       | 3167   | 72  | 20 | 0.00089      | 0.00102    | -0.11        |
| PoPhyO       | 2187   | 76  | 6  | 0.00026      | 0.00051    | -0.61        |
| PoPhyP       | 1459   | 85  | 9  | 0.00113      | 0.00108    | 0.18         |
| PoPRR3       | 1448   | 93  | 28 | 0.00079      | 0.00272    | -1.79        |
| PoPRR7       | 2634   | 86  | 56 | 0.00146      | 0.00209    | -0.98        |
| PoFTL2       | 1373   | 83  | 35 | 0.00156      | 0.00285    | -0.91        |
| PoMFTL1      | 2081   | 91  | 99 | 0.00736      | 0.0066     | 0.21         |
| Sequence 8   | 652    | 77  | 32 | 0.00984      | 0.00999    | -0.05        |
| Sequence 12  | 539    | 95  | 10 | 0.00132      | 0.00362    | -1.63        |
| Sequence 14  | 429    | 96  | 3  | 0.00073      | 0.00136    | -0.84        |
| Sequence 18  | 821    | 90  | 2  | 0.00026      | 0.00048    | -0.73        |
| Sequence 22  | 683    | 95  | 11 | 0.00157      | 0.00314    | -1.32        |
| Sequence 24  | 723    | 94  | 11 | 0.00245      | 0.00297    | -0.46        |
| Sequence 28  | 1141   | 82  | 19 | 0.00111      | 0.00335    | -1.97        |
| Sequence 31  | 649    | 95  | 10 | 0.00334      | 0.00301    | 0.28         |
| Sequence 32  | 726    | 95  | 9  | 0.00092      | 0.00242    | -1.56        |
| Sequence 33  | 803    | 92  | 20 | 0.00402      | 0.00489    | -0.52        |
| Sequence 37  | 629    | 96  | 16 | 0.00272      | 0.00495    | -1.27        |
| Sequence 49  | 535    | 93  | 9  | 0.00193      | 0.00330    | -1.05        |
| Sequence 56  | 572    | 93  | 21 | 0.00832      | 0.00719    | 0.46         |
| Sequence 58  | 600    | 95  | 23 | 0.00964      | 0.00748    | 0.86         |
| Sequence 59  | 740    | 95  | 9  | 0.00316      | 0.00237    | 0.84         |
| Sequence 60  | 434    | 96  | 2  | 0.00032      | 0.00090    | -1.00        |
| Sequence 62  | 744    | 96  | 23 | 0.00689      | 0.00602    | 0.43         |
| Sequence 68  | 601    | 92  | 16 | 0.00574      | 0.00523    | 0.28         |
| Sequence 69  | 708    | 95  | 6  | 0.00098      | 0.00165    | -0.92        |
| Sequence 70  | 929    | 95  | 28 | 0.00446      | 0.00588    | -0.73        |
| Sequence 77  | 507    | 95  | 17 | 0.00478      | 0.00654    | -0.77        |
| Sequence 87  | 633    | 90  | 6  | 0.00127      | 0.00187    | -0.73        |
| Sequence 88  | 599    | 95  | 26 | 0.00743      | 0.00847    | -0.37        |
| Sequence 89  | 642    | 95  | 8  | 0.00225      | 0.00243    | -0.18        |
| Sequence 92  | 740    | 91  | 16 | 0.00317      | 0.00425    | -0.72        |
| Sequence 99  | 557    | 82  | 5  | 0.00179      | 0.00180    | -0.02        |
| Sequence 100 | 459    | 90  | 0  | 0            | 0          | <i>n.a.</i>  |
