# Supplementary material
Source: PubMed Central journal article supplement (PMC4096357)
Supplement: supp_114.163063_TableS3.pdf [file supp_114.163063_TableS3.pdf]

**Table S3. Summary statistics for the seven populations analyzed with 14 SSRs**

| Population   | $n$ | Allelic richness | $H_e$ | $F_{IS}$ | $F_{IS}$ corrected <sup>1</sup> |
|--------------|-----|------------------|-------|----------|---------------------------------|
| Koshurnikovo | 10  | 2.52             | 0.65  | 0.20     | 0                               |
| Krasnoyarsk  | 21  | 2.56             | 0.66  | 0.24     | 0                               |
| Yeniseysk    | 26  | 2.61             | 0.66  | 0.15     | 0                               |
| Yartsevo     | 17  | 2.53             | 0.65  | 0.16     | 0                               |
| Bor          | 19  | 2.43             | 0.61  | 0.14     | 0                               |
| Turukhansk   | 16  | 2.65             | 0.69  | 0.18     | 0                               |
| Igarka       | 4   | 2.62             | 0.73  | 0.27     | 0                               |

1:  $F_{IS}$  corrected by INEST [2]
