# Supplementary material
Source: PubMed Central journal article supplement (PMC4096357)
Supplement: supp_114.163063_TableS4.pdf [file supp_114.163063_TableS4.pdf]

**Table S4. Model probabilities (bold) and Bayes factors between the three models where Bayes factors are calculated as the ratio of the marginal likelihood of the two models under comparison:  $p(y|M_1)/p(y|M_0)$**

|     | SNM          | BOT          | EXP          |
|-----|--------------|--------------|--------------|
| SNM | <b>0.365</b> | 0.878        | 1.650        |
| BOT | 1.139        | <b>0.414</b> | 1.857        |
| EXP | 0.606        | 0.539        | <b>0.222</b> |
