# Supplementary material
Source: PubMed Central journal article supplement (PMC4096357)
Supplement: supp_114.163063_TableS5.pdf [file supp_114.163063_TableS5.pdf]

**Table S5. Enrichment ratios of candidate to control SNPs (LD groups)**

|                            | 90%                   | 95%       | 97.5%    | 99%         |
|----------------------------|-----------------------|-----------|----------|-------------|
| LinReg                     | 1.1(0.7) <sup>1</sup> | 1.1(0.7)  | 1.7(0.9) | 0.8(0.8)    |
| BAYENV                     | 1.2(0.9)              | 1.7*(1.3) | 0.8(0.9) | 1.5(1.7)    |
| $F_{ST}$                   | 0.9(0.7)              | 0.9(0.8)  | 1.1(0.8) | 1(1)        |
| LinReg & BAYENV            | 1.3(0.9)              | 1.1(1)    | 1(0.8)   | 1(1)        |
| BAYENV & $F_{ST}$          | 1.8(1.4)              | 2.8(2.3)  | 1.3(1.5) | 3/0(3/0)    |
| LinReg & BAYENV & $F_{ST}$ | 1.2(1.3)              | 2/0(1/0)  | 2/0(1/0) | <i>n.a.</i> |

<sup>1</sup> Numbers in parentheses indicate the ratios calculated using LD groups.

\*: Fisher's exact test  $p$ -value < 0.05.
