# Supplementary material
Source: PubMed Central journal article supplement (PMC4096357)

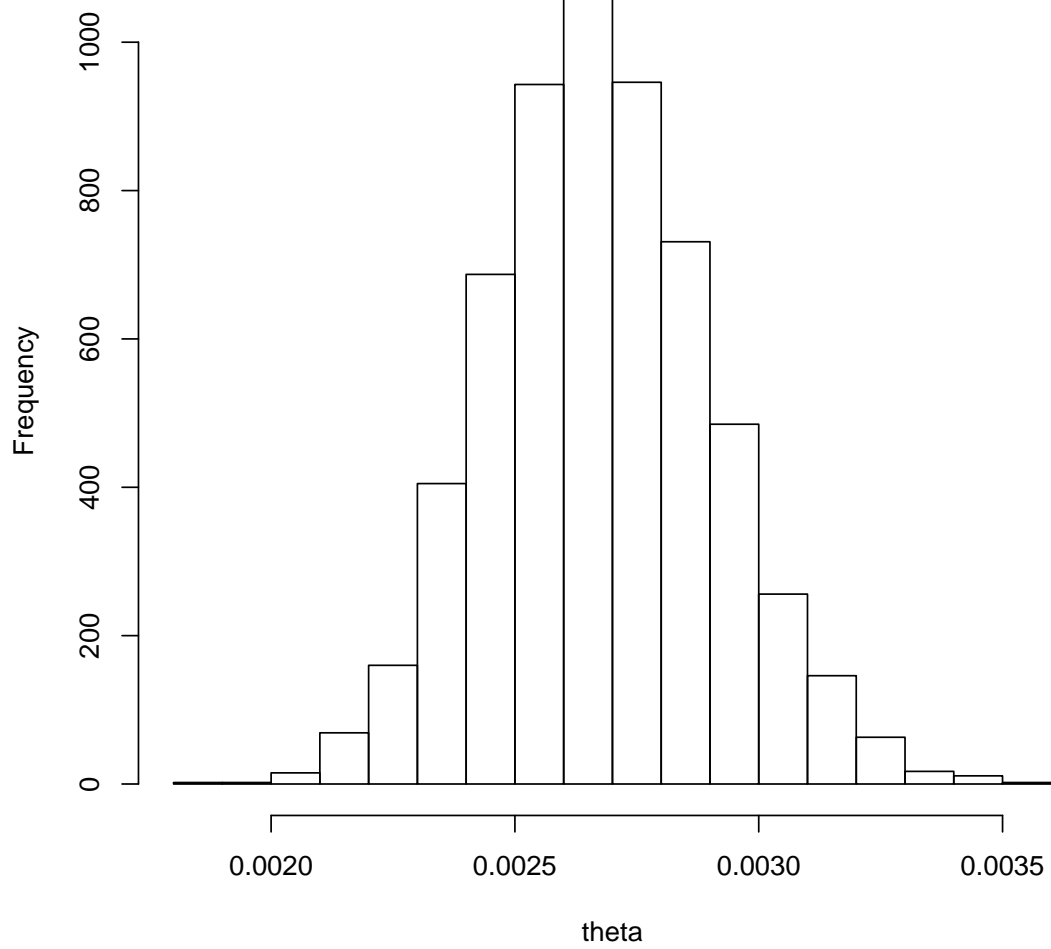

Figure S10. Posterior distribution for SNM model of  $\theta$  inferred from silent sites.

Supplement: supp_114.163063_FigureS10.pdf [file supp_114.163063_FigureS10.pdf]

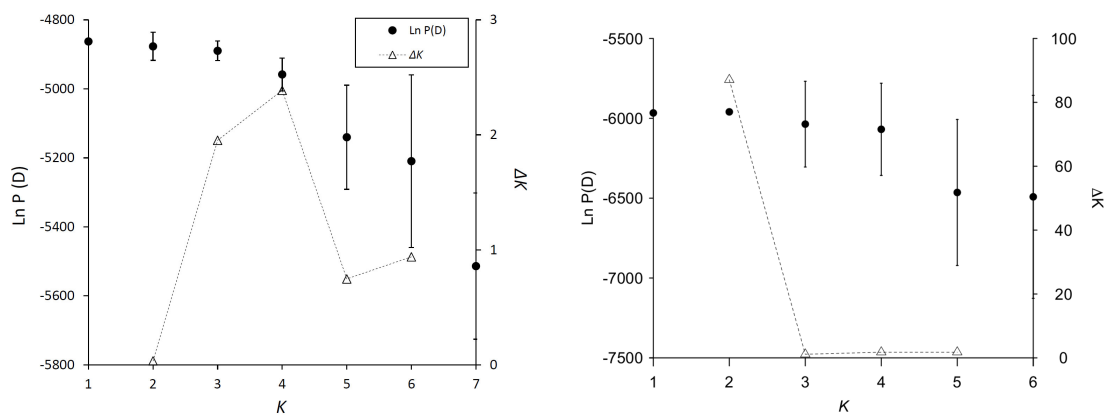

**Figure S7.**  $\ln P(D)$  and  $\Delta K$  for SSRs (left) and SNPs (right)

Supplement: supp_114.163063_FigureS7.pdf [file supp_114.163063_FigureS7.pdf]

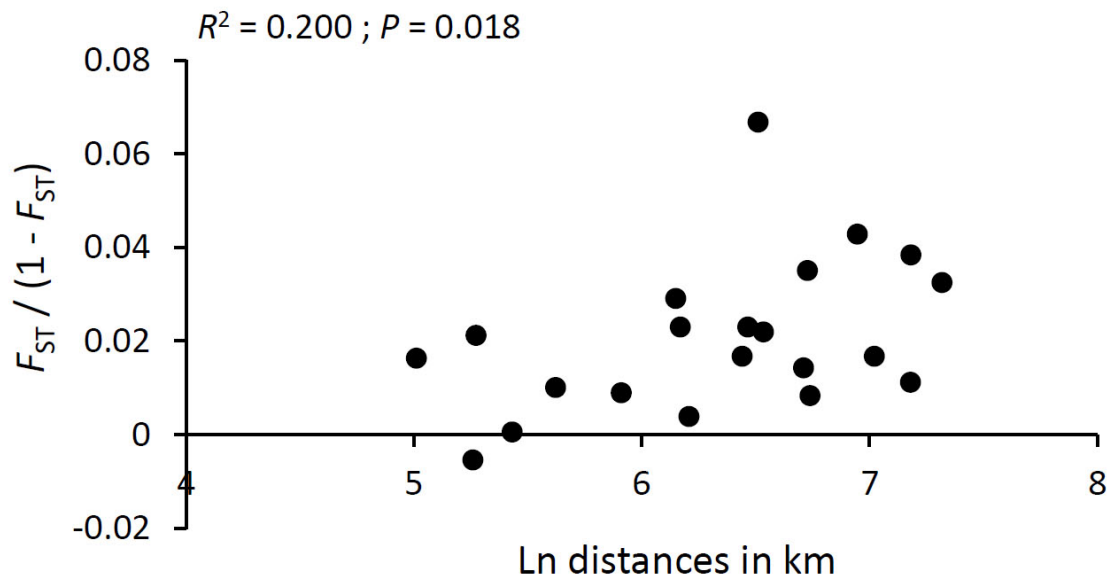

Figure S8. Isolation-by-distance estimated from the 14 SSRs loci

Supplement: supp_114.163063_FigureS8.pdf [file supp_114.163063_FigureS8.pdf]
